# Supplementary material for: Sustainable Strategies to Counteract Mycotoxins Contamination and Cowpea Weevil in Chickpea Seeds during Post-Harvest
Source: MDPI journal article supplement (doi:10.3390/toxins15010061), 2023-01-11
Supplement: s1 [file s1]

Article

# Sustainable Strategies to Counteract Mycotoxins Contamination and Cowpea Weevil in Chickpea Seeds during Post-harvest

Claudia Pisuttu, Samuele Risoli, Lorenzo Moncini, Cristina Nali, Elisa Pellegrini and Sabrina Sarrocco

**Table S1.** Analysis of variance of mycotoxins content in the four chickpea batches between the mean values determined on three different replicates.

| Mycotoxin | Source of Variation | df | Mean square | F      | P-value | F crit |
|-----------|---------------------|----|-------------|--------|---------|--------|
| Patulin   | Between Groups      | 3  | 3919.22     | 4.616  | 0.0372  | 4.07   |
|           | Within Groups       | 8  | 849.07      |        |         |        |
|           | Total               | 11 |             |        |         |        |
| AFG2      | Between Groups      | 3  | 16.56       | 67.80  | <0.001  | 4.07   |
|           | Within Groups       | 8  | 0.24        |        |         |        |
|           | Total               | 11 |             |        |         |        |
| AFG1      | Between Groups      | 3  | 0.02        | 24.79  | <0.001  | 4.07   |
|           | Within Groups       | 8  | 0.00        |        |         |        |
|           | Total               | 11 |             |        |         |        |
| AFB2      | Between Groups      | 3  | 0.11        | 170.55 | <0.001  | 4.07   |
|           | Within Groups       | 8  | 0.00        |        |         |        |
|           | Total               | 11 |             |        |         |        |
| AFB1      | Between Groups      | 3  | 0.01        | 145.56 | <0.001  | 4.07   |
|           | Within Groups       | 8  | 0.00        |        |         |        |
|           | Total               | 11 |             |        |         |        |

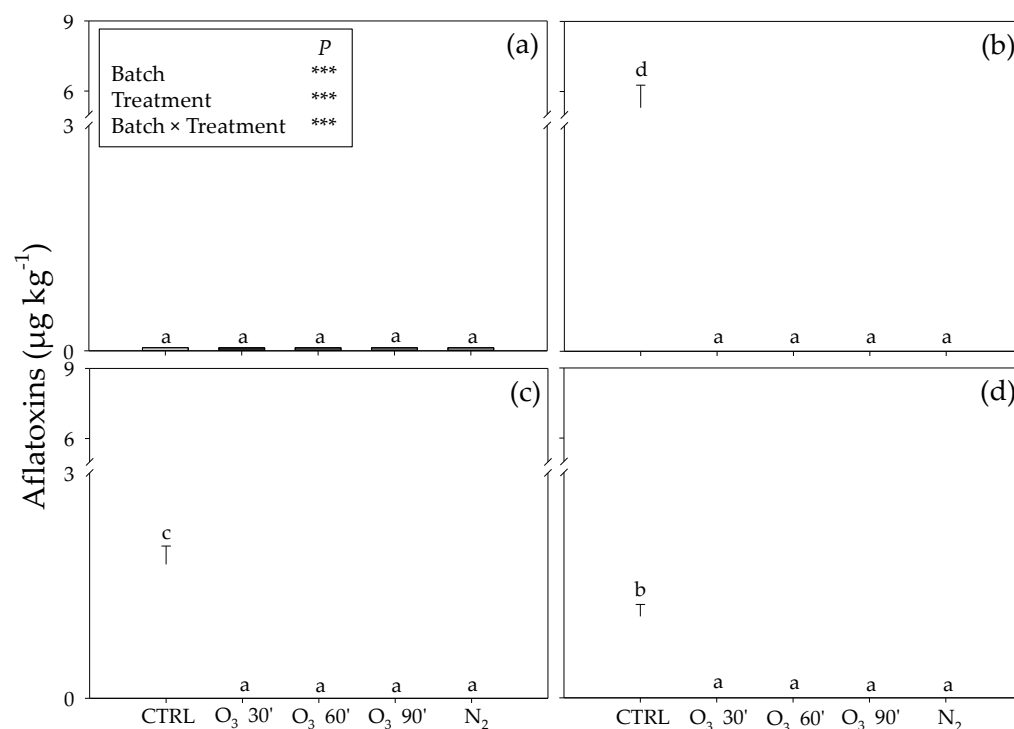

**Figure S1.** Total content of aflatoxins in four batches [n. 1 **(a)**, n. 2 **(b)**, n. 3 **(c)** and n. 4 **(d)**] of chickpea grains (CTRL, *white fill*), exposed to ozone [500 ppb O<sub>3</sub> for 30 (light grey fill), 60 (grey fill) and 90 (dark grey fill) minutes] and nitrogen treatment [99% N<sub>2</sub> for 21 consecutive days, dark fill]. Results of two-way ANOVA are reported, asterisks show the significance of factors/interaction for: \*\*\*  $p \leq 0.001$ . According to Tukey's HSD post hoc test, different letters indicate significant differences ( $p \leq 0.05$ ).
